# Supplementary material for: Comprehensive phytochemical analysis of lingonberry (Vaccinium vitis-idaea L.) from different regions of China and their potential antioxidant and antiproliferative activities
Source: PubMed Central journal article supplement — RSC Adv. 2023 Oct 9;13(42):29438–49. doi: 10.1039/d3ra05698h (PMC10561374; doi:10.1039/d3ra05698h), 2023-10-09
Supplement: RA-013-D3RA05698H-s001.pdf [file RA-013-D3RA05698H-s001.pdf]

### Supplementary materials:

#### Comprehensive phytochemical analysis of lingonberry (*Vaccinium vitis-idaea* L.) from different regions of China and their potential antioxidant and antiproliferative activities

Jian Xu,<sup>ab</sup> Han Yang,<sup>ab</sup> Chengdong Nie,<sup>ab</sup> Tao Wang,<sup>ab</sup> Xiangyu Qin,<sup>ab</sup> Jie Yang,<sup>ab</sup> Yuanhang Chang,<sup>ab</sup> Siming Nie<sup>ab</sup> and Yujie Fu<sup>\*c</sup>

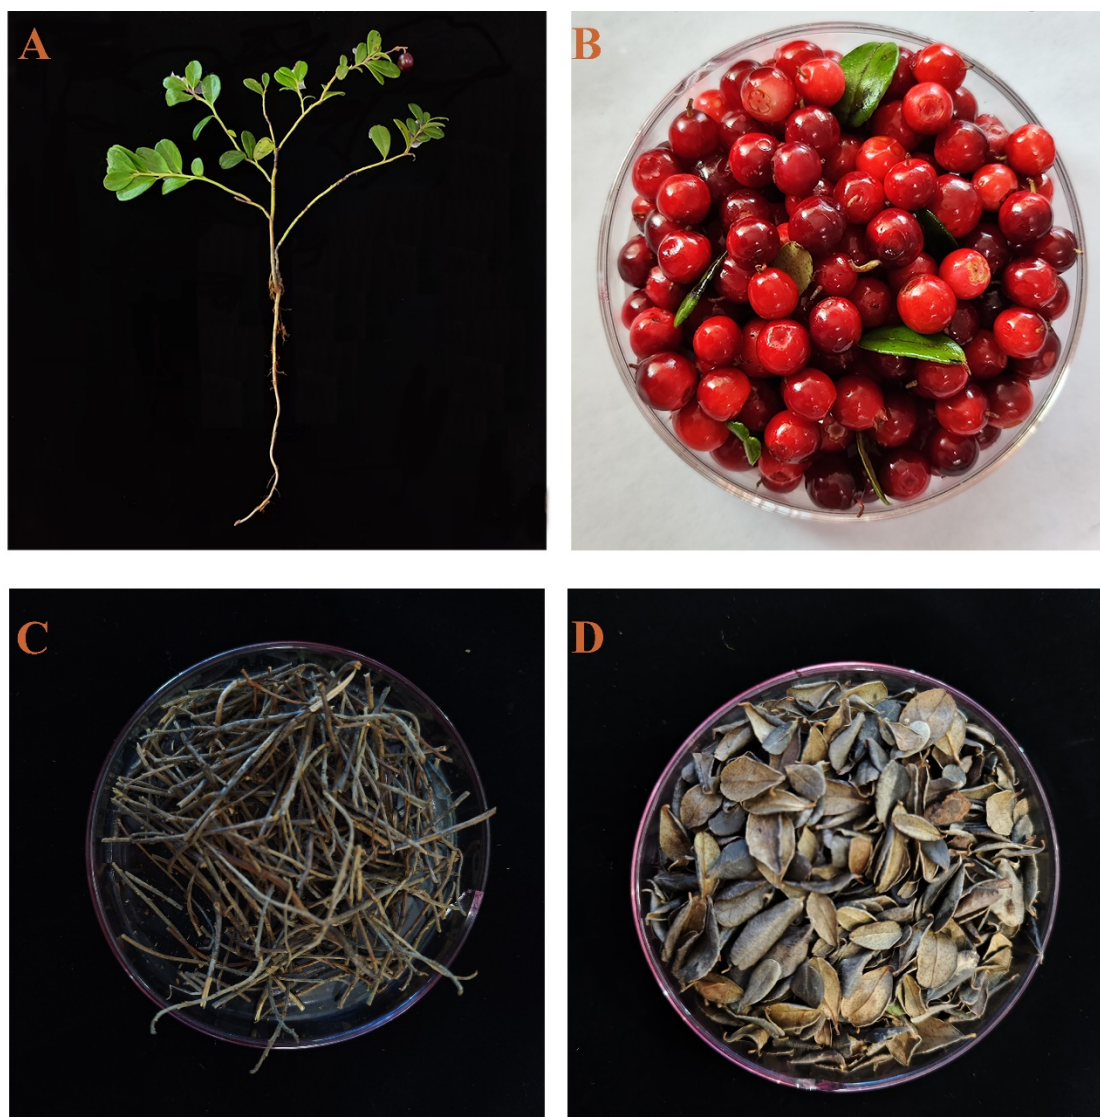

Fig. S1 Lingonberry (*Vaccinium vitis-idaea* L.)-related materials: (A) plant, (B) fruits, (C) stems, (D) leaves.

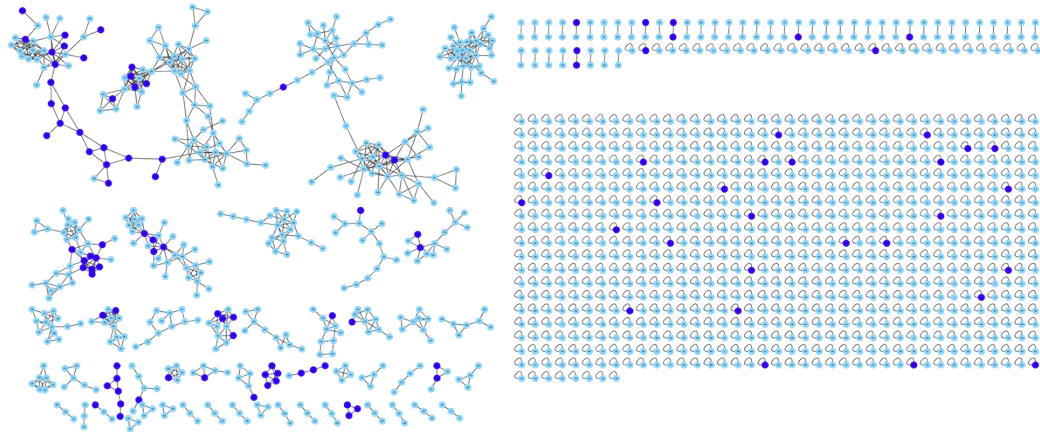

1  
 2 **Fig. S2** The molecular network of metabolites in lingonberry constructed based on MS/MS similarity. Nodes in blue  
 3 are the identified metabolites in GNPS platform  
 4 (<https://gnps.ucsd.edu/ProteoSAFe/status.jsp?task=19607c33ecb2444780b575354ab39f5b>).

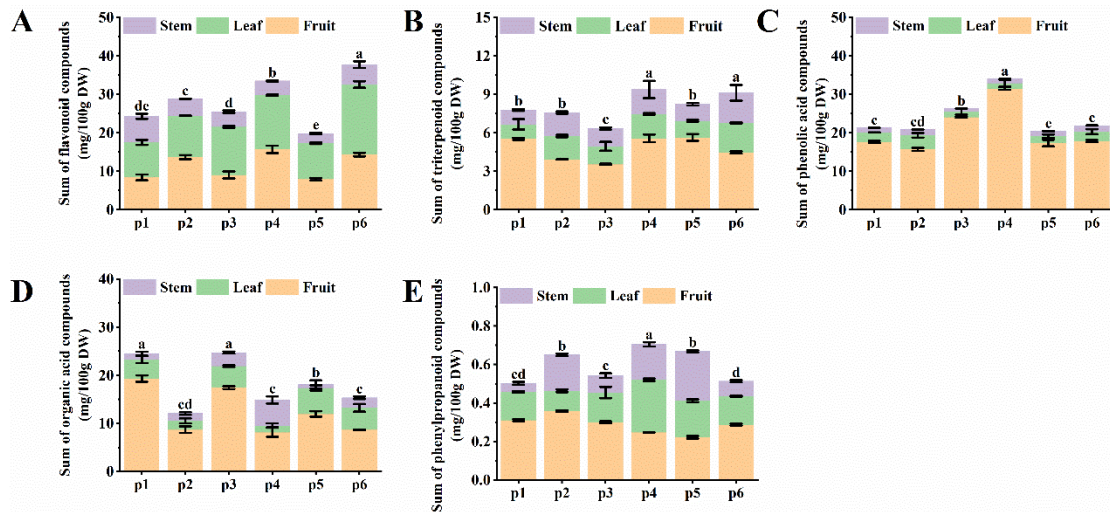

5  
 6 **Fig. S3** Distribution of the sum of various classes of compounds in lingonberries of different origins. (A) Sum of  
 7 flavonoid compounds; (B) Sum of triterpene compounds; (C) Sum of phenolic acid compounds; (D) Sum of organic  
 8 acid compounds; (E) Sum of phenylpropanoid compounds.

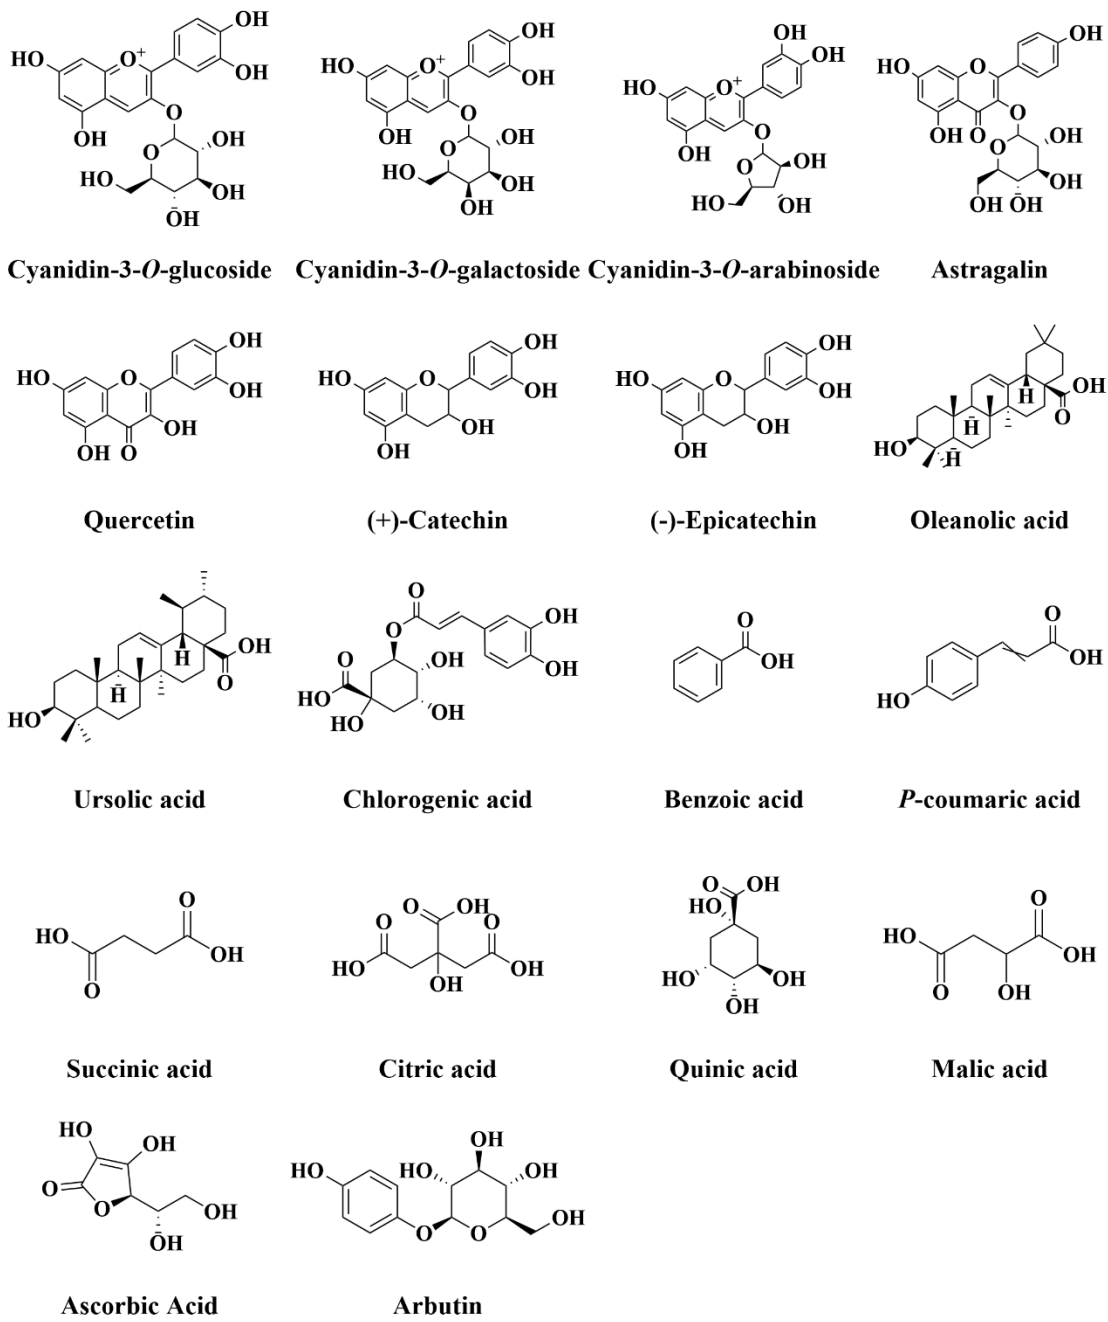

10 **Fig. S4** Identified metabolites in lingonberry (fruits, leaves and stems) and chemical marker selection

11 **Table S1** Identified metabolites in lingonberry.

| NO. | Compound                                    | Molecular formula                               | Expected m/z | Measured m/z | Error (ppm) | MS <sup>2</sup>        | Reference Ion      | Class        | Matching Score (MzCloud) | Identifacati on      |
|-----|---------------------------------------------|-------------------------------------------------|--------------|--------------|-------------|------------------------|--------------------|--------------|--------------------------|----------------------|
| 1   | ※Cyanidin-3- <i>O</i> -arabinoside          | C <sub>20</sub> H <sub>19</sub> O <sub>10</sub> | 419.81       | 421.20       | 1.39        | 364.60, 287.00         | [M+H] <sup>+</sup> | Anthocyanins |                          | TCM                  |
| 2   | ※Cyanidin-3- <i>O</i> -galactoside          | C <sub>21</sub> H <sub>21</sub> O <sub>11</sub> | 448.09       | 449.10       | 1.01        | 287.00                 | [M+H] <sup>+</sup> | Anthocyanins |                          | TCM                  |
| 3   | ※Cyanidin-3- <i>O</i> -glucoside            | C <sub>21</sub> H <sub>21</sub> O <sub>11</sub> | 448.05       | 449.06       | 1.01        | 287.00                 | [M+H] <sup>+</sup> | Anthocyanins |                          | TCM                  |
| 4   | Psoralidin                                  | C <sub>20</sub> H <sub>16</sub> O <sub>5</sub>  | 336.10       | 337.11       | 1.01        | 203.58                 | [M+H] <sup>+</sup> | Coumarin     | 83.5                     | MzCloud <sup>1</sup> |
| 5   | Fraxetin                                    | C <sub>10</sub> H <sub>8</sub> O <sub>5</sub>   | 208.03       | 207.03       | 1.01        | 194.02, 166.02         | [M-H] <sup>-</sup> | Coumarin     | 94.1                     | MzCloud              |
| 6   | Esculin                                     | C <sub>15</sub> H <sub>16</sub> O <sub>9</sub>  | 340.07       | 339.07       | 1.01        | 177.02                 | [M-H] <sup>-</sup> | Coumarin     | 88.2                     | MzCloud <sup>2</sup> |
| 7   | 15-OxoEDE                                   | C <sub>20</sub> H <sub>34</sub> O <sub>3</sub>  | 305.24       | 305.25       | 0.00        | 135.12, 93.07          | [M+H] <sup>+</sup> | Fatty acids  |                          | GNPS                 |
| 8   | Tetradecyldiethanolamine                    | C <sub>18</sub> H <sub>39</sub> NO <sub>2</sub> | 302.31       | 301.20       | 1.11        | 106.08, 70.06          | [M-H] <sup>-</sup> | Fatty acids  |                          | GNPS                 |
| 9   | 13S-hydroxy-6Z,9Z,11E-octadecatrienoic acid | C <sub>18</sub> H <sub>30</sub> O <sub>3</sub>  | 293.17       | 293.21       | 0.04        | 221.1, 192.11          | [M-H] <sup>-</sup> | Fatty acids  |                          | GNPS                 |
| 10  | Chaulmoogric acid                           | C <sub>18</sub> H <sub>32</sub> O <sub>2</sub>  | 280.09       | 281.25       | 1.16        | 81.07, 67.05           | [M+H] <sup>+</sup> | Fatty acids  |                          | GNPS                 |
| 11  | 9-hydroxy-10,12-octadecadienoic acid        | C <sub>18</sub> H <sub>32</sub> O <sub>3</sub>  | 295.22       | 295.23       | 0.00        | 277.21, 195.14, 171.10 | [M-H] <sup>-</sup> | Fatty acids  |                          | GNPS                 |
| 12  | Hydroxyoctadecanoic acid                    | C <sub>18</sub> H <sub>36</sub> O <sub>3</sub>  | 299.25       | 299.26       | 0.00        | 253.25, 169.16, 113.00 | [M-H] <sup>-</sup> | Fatty acids  |                          | GNPS                 |
| 13  | Linolenic acid ethyl ester                  | C <sub>20</sub> H <sub>34</sub> O <sub>2</sub>  | 306.25       | 307.26       | 1.01        | 95.08                  | [M+H] <sup>+</sup> | Fatty acids  | 74.6                     | MzCloud              |
| 14  | Cis-5,8,11,14,17-Eicosapentaenoic acid      | C <sub>20</sub> H <sub>30</sub> O <sub>2</sub>  | 302.22       | 301.21       | 1.01        | 269.19                 | [M-H] <sup>-</sup> | Fatty acids  | 77.8                     | MzCloud              |
| 15  | Docosaheptaenoic acid                       | C <sub>22</sub> H <sub>32</sub> O <sub>2</sub>  | 318.27       | 319.28       | 1.01        | 225.19                 | [M+H] <sup>+</sup> | Fatty acids  | 79.2                     | MzCloud <sup>3</sup> |
| 16  | Eicosapentaenoic acid                       | C <sub>20</sub> H <sub>30</sub> O <sub>2</sub>  | 302.22       | 303.23       | 1.01        | 119.09                 | [M+H] <sup>+</sup> | Fatty acids  | 81.3                     | MzCloud              |
| 17  | 18-β-Glycyrrhetic acid                      | C <sub>30</sub> H <sub>46</sub> O <sub>4</sub>  | 470.33       | 469.33       | 1.01        | 141.03                 | [M-H] <sup>-</sup> | Fatty acids  | 80.9                     | MzCloud              |

## 13 Continued

| NO. | Compound                                | Molecular formula                               | Expected m/z | Measured m/z | Error (ppm) | MS2                   | Reference Ion      | Class      | Matching Score (MzCloud) | Identifacati on   |
|-----|-----------------------------------------|-------------------------------------------------|--------------|--------------|-------------|-----------------------|--------------------|------------|--------------------------|-------------------|
| 18  | Fisetin                                 | C <sub>15</sub> H <sub>10</sub> O <sub>6</sub>  | 286.04       | 287.05       | 1.01        | 137.02                | [M+H] <sup>+</sup> | Flavonoids | 90.5                     | MzCloud           |
| 19  | ※ (-)-Epicatechin                       | C <sub>15</sub> H <sub>14</sub> O <sub>6</sub>  | 291.08       | 291.09       | 0.01        | 139.00                | [M+H] <sup>+</sup> | Flavonoids |                          | GNPS              |
| 20  | Isoquercitrin                           | C <sub>21</sub> H <sub>20</sub> O <sub>12</sub> | 463.08       | 463.09       | 0.01        | 300.00, 271.02        | [M-H] <sup>-</sup> | Flavonoids |                          | GNPS              |
| 21  | Kaempferol-3- <i>O</i> -glucoside       | C <sub>21</sub> H <sub>20</sub> O <sub>11</sub> | 447.09       | 447.09       | 0.01        | 284.00, 255.03        | [M-H] <sup>-</sup> | Flavonoids |                          | GNPS              |
| 22  | ※ (+)-Catechin                          | C <sub>15</sub> H <sub>14</sub> O <sub>6</sub>  | 291.07       | 289.07       | 0.00        | 123.04, 109.00, 97.03 | [M-H] <sup>-</sup> | Flavonoids |                          | GNPS              |
| 23  | Epigallocatechin                        | C <sub>15</sub> H <sub>14</sub> O <sub>7</sub>  | 307.08       | 307.08       | 0.01        | 139.00                | [M+H] <sup>+</sup> | Flavonoids |                          | GNPS <sup>2</sup> |
| 24  | Plantaginin                             | C <sub>21</sub> H <sub>20</sub> O <sub>11</sub> | 447.09       | 447.09       | 0.00        | 284.00                | [M-H] <sup>-</sup> | Flavonoids |                          | GNPS <sup>4</sup> |
| 25  | Kaempferol-3- <i>O</i> -glucopyranoside | C <sub>21</sub> H <sub>20</sub> O <sub>12</sub> | 449.10       | 449.11       | 0.01        | 287.00                | [M+H] <sup>+</sup> | Flavonoids |                          | GNPS <sup>5</sup> |
| 26  | Procyanidin B1                          | C <sub>30</sub> H <sub>26</sub> O <sub>12</sub> | 577.13       | 577.13       | 0.01        | 407.07, 289.0         | [M-H] <sup>-</sup> | Flavonoids |                          | GNPS              |
| 27  | Procyanidin B2                          | C <sub>30</sub> H <sub>26</sub> O <sub>12</sub> | 579.14       | 579.15       | 0.01        | 409.08, 287.05, 127.0 | [M+H] <sup>+</sup> | Flavonoids |                          | GNPS              |
| 28  | ※ Quercitrin                            | C <sub>21</sub> H <sub>20</sub> O <sub>11</sub> | 449.10       | 449.11       | 0.01        | 303.00, 287.05, 85.03 | [M+H] <sup>+</sup> | Flavonoids |                          | GNPS              |
| 29  | Avicularin                              | C <sub>20</sub> H <sub>18</sub> O <sub>11</sub> | 435.02       | 435.09       | 0.07        | 303.00                | [M+H] <sup>+</sup> | Flavonoids |                          | GNPS <sup>6</sup> |
| 30  | Quercetin-3-glucuronide                 | C <sub>21</sub> H <sub>18</sub> O <sub>13</sub> | 479.07       | 479.08       | 0.01        | 303.00                | [M+H] <sup>+</sup> | Flavonoids |                          | GNPS <sup>7</sup> |
| 31  | Eriodictyol-7- <i>O</i> -glucoside      | C <sub>21</sub> H <sub>22</sub> O <sub>11</sub> | 449.10       | 449.10       | 0.00        | 287.05, 151.0, 135.04 | [M+H] <sup>+</sup> | Flavonoids |                          | GNPS              |
| 32  | 5,6,2'-Trimethoxyflavone                | C <sub>18</sub> H <sub>16</sub> O <sub>5</sub>  | 311.12       | 311.09       | 0.02        | 183.00                | [M-H] <sup>-</sup> | Flavonoids |                          | GNPS <sup>2</sup> |
| 33  | Quercetin 3- <i>O</i> -glucuronide      | C <sub>21</sub> H <sub>18</sub> O <sub>13</sub> | 477.07       | 477.07       | 0.00        | 301.00, 151.00        | [M+H] <sup>+</sup> | Flavonoids |                          | GNPS              |
| 34  | ※ Quercetrin                            | C <sub>21</sub> H <sub>20</sub> O <sub>11</sub> | 447.10       | 447.09       | 0.01        | 300.00                | [M-H] <sup>-</sup> | Flavonoids |                          | GNPS              |
| 35  | Rutoside                                | C <sub>27</sub> H <sub>30</sub> O <sub>16</sub> | 609.12       | 609.15       | 0.03        | 300.10, 151.10        | [M+H] <sup>+</sup> | Flavonoids |                          | GNPS              |

## 14 Continued

| NO. | Compound                            | Molecular formula                               | Expected m/z | Measured m/z | Error (ppm) | MS2            | Reference Ion      | Class      | Matching Score (MzCloud) | Identifacati on       |
|-----|-------------------------------------|-------------------------------------------------|--------------|--------------|-------------|----------------|--------------------|------------|--------------------------|-----------------------|
| 36  | Procyanidin A2                      | C <sub>30</sub> H <sub>24</sub> O <sub>12</sub> | 577.22       | 577.13       | 0.08        | 425.08, 287.0  | [M+H] <sup>+</sup> | Flavonoids |                          | GNPS                  |
| 37  | Quercetin-3- <i>O</i> -rhamnoside   | C <sub>21</sub> H <sub>20</sub> O <sub>11</sub> | 471.08       | 471.09       | 0.01        | 325.00, 169.04 | [M+H] <sup>+</sup> | Flavonoids |                          | GNPS                  |
| 38  | Phlorhizin                          | C <sub>21</sub> H <sub>24</sub> O <sub>10</sub> | 435.12       | 435.13       | 0.01        | 273.07, 167.00 | [M-H] <sup>-</sup> | Flavonoids |                          | GNPS                  |
| 39  | $\alpha$ -Eleostearic acid          | C <sub>18</sub> H <sub>30</sub> O <sub>2</sub>  | 278.22       | 279.23       | 1.01        | 95.09, 67.09   | [M+H] <sup>+</sup> | Flavonoids | 88.6                     | MzCloud               |
| 40  | Quercetin-3 $\beta$ -D-glucoside    | C <sub>21</sub> H <sub>20</sub> O <sub>12</sub> | 464.09       | 463.08       | 1.01        | 300.02         | [M-H] <sup>-</sup> | Flavonoids | 93.1                     | MzCloud <sup>5</sup>  |
| 41  | ※Quercetin                          | C <sub>15</sub> H <sub>10</sub> O <sub>7</sub>  | 302.04       | 303.04       | 1.01        | 151.00         | [M+H] <sup>+</sup> | Flavonoids |                          | TCM                   |
| 42  | ※Epicatechin                        | C <sub>15</sub> H <sub>14</sub> O <sub>6</sub>  | 290.07       | 291.08       | 1.01        | 139.00         | [M+H] <sup>+</sup> | Flavonoids |                          | TCM                   |
| 43  | Eriodictyol                         | C <sub>15</sub> H <sub>12</sub> O <sub>6</sub>  | 288.06       | 289.07       | 1.01        | 153.02         | [M+H] <sup>+</sup> | Flavonoids | 90.8                     | MzCloud <sup>8</sup>  |
| 44  | Afzelin                             | C <sub>21</sub> H <sub>20</sub> O <sub>10</sub> | 432.10       | 431.09       | 1.01        | 285.04         | [M-H] <sup>-</sup> | Flavonoids | 89.4                     | MzCloud <sup>9</sup>  |
| 45  | ※Kaempferol                         | C <sub>15</sub> H <sub>10</sub> O <sub>6</sub>  | 304.05       | 305.06       | 1.01        | 187.00         | [M+H] <sup>+</sup> | Flavonoids |                          | TCM                   |
| 46  | Hyperoside                          | C <sub>21</sub> H <sub>20</sub> O <sub>12</sub> | 464.09       | 465.10       | 1.01        | 303.04         | [M+H] <sup>+</sup> | Flavonoids | 80.1                     | MzCloud <sup>8</sup>  |
| 47  | Cynaroside                          | C <sub>21</sub> H <sub>20</sub> O <sub>11</sub> | 448.09       | 449.10       | 1.01        | 285.04         | [M+H] <sup>+</sup> | Flavonoids | 79.4                     | MzCloud <sup>10</sup> |
| 48  | ※Rutin                              | C <sub>27</sub> H <sub>30</sub> O <sub>16</sub> | 610.14       | 611.15       | 1.01        | 300.00         | [M+H] <sup>+</sup> | Flavonoids |                          | TCM                   |
| 49  | Kaempferol 3- <i>O</i> -galactoside | C <sub>21</sub> H <sub>20</sub> O <sub>11</sub> | 448.09       | 449.10       | 1.01        | 285.21, 255.15 | [M+H] <sup>+</sup> | Flavonoids |                          | GNPS <sup>5</sup>     |
| 50  | ※Caffeic acid                       | C <sub>9</sub> H <sub>8</sub> O <sub>4</sub>    | 179.95       | 178.95       | 1.01        | 134.70         | [M-H] <sup>-</sup> | Flavonoids |                          | TCM                   |
| 51  | ※Astragalin                         | C <sub>21</sub> H <sub>20</sub> O <sub>11</sub> | 448.40       | 447.00       | 1.40        | 284.00         | [M-H] <sup>-</sup> | Flavonoids |                          | TCM                   |
| 52  | ※Myricetin                          | C <sub>15</sub> H <sub>10</sub> O <sub>8</sub>  | 318.24       | 316.90       | 1.34        | 150.90         | [M-H] <sup>-</sup> | Flavonoids |                          | TCM                   |
| 53  | ※Luteolin                           | C <sub>15</sub> H <sub>10</sub> O <sub>6</sub>  | 286.24       | 284.80       | 1.44        | 132.90         | [M-H] <sup>-</sup> | Flavonoids |                          | TCM                   |

## 15 Continued

| NO. | Compound                  | Molecular formula                               | Expected m/z | Measured m/z | Error (ppm) | MS2                  | Reference Ion      | Class           | Matching Score (MzCloud) | Identifacati on       |
|-----|---------------------------|-------------------------------------------------|--------------|--------------|-------------|----------------------|--------------------|-----------------|--------------------------|-----------------------|
| 54  | ※Isoquercitin             | C <sub>21</sub> H <sub>20</sub> O <sub>12</sub> | 463.26       | 465.10       | 1.84        | 301.20               | [M+H] <sup>+</sup> | Flavonoids      |                          | GNPS                  |
| 55  | Phytosphingosine          | C <sub>18</sub> H <sub>39</sub> NO <sub>3</sub> | 318.39       | 318.30       | 0.09        | 60.04                | [M-H] <sup>-</sup> | Lipids          |                          | GNPS <sup>11</sup>    |
| 56  | (+)- $\alpha$ -Tocopherol | C <sub>29</sub> H <sub>50</sub> O <sub>2</sub>  | 433.36       | 431.38       | 1.98        | 167.00               | [M+H] <sup>+</sup> | Lipids          |                          | GNPS <sup>12</sup>    |
| 57  | ※Ascorbic acid            | C <sub>6</sub> H <sub>8</sub> O <sub>6</sub>    | 176.12       | 175.00       | 1.11        | 115.00               | [M-H] <sup>-</sup> | Organic acid    |                          | TCM                   |
| 58  | ※Citric acid              | C <sub>6</sub> H <sub>8</sub> O <sub>7</sub>    | 192.13       | 191.12       | 1.01        | 110.00               | [M-H] <sup>-</sup> | Organic acid    |                          | TCM                   |
| 59  | ※Succinic acid            | C <sub>4</sub> H <sub>6</sub> O <sub>4</sub>    | 118.09       | 116.70       | 1.39        | 73.00                | [M-H] <sup>-</sup> | Organic acid    |                          | TCM                   |
| 60  | ※Malic acid               | C <sub>4</sub> H <sub>6</sub> O <sub>5</sub>    | 134.09       | 132.90       | 1.19        | 115.00               | [M-H] <sup>-</sup> | Organic acid    |                          | TCM                   |
| 61  | Iso Ferulic acid          | C <sub>10</sub> H <sub>10</sub> O <sub>4</sub>  | 193.05       | 193.05       | 0.00        | 137.02, 106.40       | [M+H] <sup>+</sup> | Organic acid    |                          | GNPS                  |
| 62  | $\beta$ -Tocopherol       | C <sub>28</sub> H <sub>48</sub> O <sub>2</sub>  | 415.85       | 417.37       | 1.52        | 191.10, 151.00       | [M-H] <sup>-</sup> | Other           |                          | GNPS                  |
| 63  | Cannabidiolic acid        | C <sub>22</sub> H <sub>30</sub> O <sub>4</sub>  | 358.21       | 357.20       | 1.01        | 245.16               | [M-H] <sup>-</sup> | Other           | 70.9                     | MzCloud <sup>13</sup> |
| 64  | Scropeanoside I           | C <sub>31</sub> H <sub>40</sub> O <sub>16</sub> | 668.21       | 669.22       | 1.01        | 323.12, 177.21       | [M+H] <sup>+</sup> | Other           | 72.5                     | MzCloud               |
| 65  | ※Ferulic acid             | C <sub>10</sub> H <sub>10</sub> O <sub>4</sub>  | 194.05       | 193.05       | 1.01        | 133.90               | [M-H] <sup>-</sup> | Phenolic acids  |                          | TCM                   |
| 66  | ※Benzoic acid             | C <sub>7</sub> H <sub>6</sub> O <sub>2</sub>    | 122.03       | 121.03       | 1.01        | 76.90                | [M-H] <sup>-</sup> | Phenolic acids  |                          | TCM                   |
| 67  | ※Quinic acid              | C <sub>7</sub> H <sub>12</sub> O <sub>6</sub>   | 191.99       | 193.00       | 1.01        | 84.90                | [M+H] <sup>+</sup> | Phenolic acids  |                          | TCM                   |
| 68  | ※ <i>P</i> -coumaric acid | C <sub>9</sub> H <sub>8</sub> O <sub>3</sub>    | 164.16       | 162.90       | 1.26        | 119.00               | [M-H] <sup>-</sup> | Phenolic acids  |                          | TCM                   |
| 69  | Salicin                   | C <sub>13</sub> H <sub>18</sub> O <sub>7</sub>  | 288.29       | 287.11       | 1.17        | 106.08, 88.08, 70.06 | [M+H] <sup>+</sup> | Phenolic acids  |                          | GNPS                  |
| 70  | Rhodioloside              | C <sub>14</sub> H <sub>20</sub> O <sub>7</sub>  | 299.09       | 299.11       | 0.02        | 137.02, 89.02, 59.01 | [M-H] <sup>-</sup> | Phenylethanoids |                          | GNPS                  |
| 71  | Salidroside               | C <sub>14</sub> H <sub>20</sub> O <sub>7</sub>  | 318.40       | 318.15       | 0.24        | 121.6, 85.03         | [M+H] <sup>+</sup> | Phenylethanoids |                          | GNPS                  |

## 16 Continued

| NO. | Compound                          | Molecular formula                                | Expected m/z | Measured m/z | Error (ppm) | MS2                  | Reference Ion      | Class            | Matching Score (MzCloud) | Identifacati on      |
|-----|-----------------------------------|--------------------------------------------------|--------------|--------------|-------------|----------------------|--------------------|------------------|--------------------------|----------------------|
| 72  | Amygdalin                         | C <sub>20</sub> H <sub>27</sub> NO <sub>11</sub> | 454.32       | 456.15       | 1.83        | 161.04, 89.02        | [M-H] <sup>-</sup> | Phenylpropanoids |                          | GNPS                 |
| 73  | ※Arbutin                          | C <sub>12</sub> H <sub>16</sub> O <sub>7</sub>   | 271.08       | 271.08       | 0.00        | 108.00               | [M+H] <sup>+</sup> | Phenylpropanoids |                          | GNPS                 |
| 74  | 6,7-Dihydroxycoumarin-6-glucoside | C <sub>15</sub> H <sub>16</sub> O <sub>9</sub>   | 339.07       | 339.07       | 0.00        | 177.00               | [M+H] <sup>+</sup> | Phenylpropanoids |                          | GNPS                 |
| 75  | Fraxin                            | C <sub>16</sub> H <sub>18</sub> O <sub>10</sub>  | 369.08       | 369.08       | 0.01        | 207.00, 192.00       | [M+H] <sup>+</sup> | Phenylpropanoids |                          | GNPS                 |
| 76  | ※Isochlorogenic acid              | C <sub>16</sub> H <sub>18</sub> O <sub>9</sub>   | 353.02       | 353.00       | 0.02        | 191.00               | [M-H] <sup>-</sup> | Phenylpropanoids |                          | GNPS                 |
| 77  | Auraptene                         | C <sub>19</sub> H <sub>22</sub> O <sub>3</sub>   | 301.03       | 299.16       | 1.87        | 162.90               | [M-H] <sup>-</sup> | Phenylpropanoids |                          | GNPS <sup>12</sup>   |
| 78  | Osmanthuside H                    | C <sub>19</sub> H <sub>28</sub> O <sub>11</sub>  | 429.94       | 431.16       | 1.21        | 149.04, 89.02, 59.01 | [M+H] <sup>+</sup> | Phenylpropanoids |                          | GNPS                 |
| 79  | Schisandrin A                     | C <sub>24</sub> H <sub>32</sub> O <sub>6</sub>   | 417.22       | 417.23       | 0.01        | 316.10, 301.00       | [M-H] <sup>-</sup> | Phenylpropanoids |                          | GNPS                 |
| 80  | Coumaroylquinic acid              | C <sub>16</sub> H <sub>18</sub> O <sub>8</sub>   | 337.09       | 337.13       | 0.04        | 191.05,173.00        | [M-H] <sup>-</sup> | Phenylpropanoids |                          | GNPS                 |
| 81  | ※Chlorogenic acid                 | C <sub>16</sub> H <sub>18</sub> O <sub>9</sub>   | 354.09       | 353.08       | 1.01        | 190.90               | [M-H] <sup>-</sup> | Phenylpropanoids |                          | TCM                  |
| 82  | β-Zearalanol                      | C <sub>18</sub> H <sub>26</sub> O <sub>5</sub>   | 323.22       | 323.19       | 0.03        | 305.20               | [M+H] <sup>+</sup> | Polyketides      |                          | GNPS <sup>14</sup>   |
| 83  | Trehalose                         | C <sub>12</sub> H <sub>22</sub> O <sub>11</sub>  | 341.10       | 341.11       | 0.01        | 113.02, 89.02, 59.01 | [M-H] <sup>-</sup> | Saccharides      |                          | GNPS                 |
| 84  | Melezitose                        | C <sub>18</sub> H <sub>32</sub> O <sub>16</sub>  | 527.15       | 527.16       | 0.01        | 365.10               | [M+H] <sup>+</sup> | Saccharides      |                          | GNPS <sup>14</sup>   |
| 85  | Melibiose                         | C <sub>12</sub> H <sub>24</sub> O <sub>12</sub>  | 365.11       | 365.11       | 0.00        | 203.00               | [M+H] <sup>+</sup> | Saccharides      |                          | GNPS <sup>14</sup>   |
| 86  | D-Raffinose                       | C <sub>18</sub> H <sub>32</sub> O <sub>16</sub>  | 526.14       | 527.15       | 1.01        | 365.10               | [M+H] <sup>+</sup> | Saccharides      | 73.5                     | MzCloud <sup>2</sup> |
| 87  | β-Amyrin                          | C <sub>30</sub> H <sub>50</sub> O                | 426.70       | 427.28       | 1.1         | 149.1, 109.10        | [M+H] <sup>+</sup> | Terpenoids       |                          | GNPS                 |
| 88  | β-Tocopherol                      | C <sub>29</sub> H <sub>50</sub> O <sub>2</sub>   | 431.68       | 431.38       | 0.30        | 165.00               | [M-H] <sup>-</sup> | Terpenoids       |                          | GNPS <sup>12</sup>   |
| 89  | Delta4-Dafachronic acid           | C <sub>27</sub> H <sub>42</sub> O <sub>3</sub>   | 413.37       | 415.32       | 1.95        | 109.00,97.06         | [M+H] <sup>+</sup> | Terpenoids       |                          | GNPS                 |



17 Continued

| NO. | Compound            | Molecular formula                              | Expected m/z | Measured m/z | Error (ppm) | MS2                    | Reference Ion      | Class      | Matching Score (MzCloud) | Identifacati on |
|-----|---------------------|------------------------------------------------|--------------|--------------|-------------|------------------------|--------------------|------------|--------------------------|-----------------|
| 90  | $\beta$ -Sitosterol | C <sub>29</sub> H <sub>50</sub> O              | 397.38       | 397.60       | 0.22        | 257.22, 147.10, 109.10 | [M-H] <sup>-</sup> | Terpenoids |                          | GNPS            |
| 91  | Sclareol            | C <sub>20</sub> H <sub>36</sub> O <sub>2</sub> | 309.17       | 307.26       | 1.91        | 96.96, 80.95           | [M-H] <sup>-</sup> | Terpenoids |                          | GNPS            |
| 92  | Delta Tocopherol    | C <sub>27</sub> H <sub>46</sub> O <sub>2</sub> | 402.81       | 403.35       | 0.54        | 177.09, 137.0          | [M+H] <sup>+</sup> | Terpenoids |                          | GNPS            |
| 93  | ※Ursolic acid       | C <sub>30</sub> H <sub>48</sub> O <sub>3</sub> | 456.35       | 455.35       | 1.01        | 411.00                 | [M-H] <sup>-</sup> | Triterpene |                          | TCM             |
| 94  | ※Oleanolic acid     | C <sub>30</sub> H <sub>48</sub> O <sub>3</sub> | 438.34       | 439.35       | 1.01        | 411.00                 | [M+H] <sup>+</sup> | Triterpene |                          | TCM             |
| 95  | Lupeol              | C <sub>30</sub> H <sub>50</sub> O              | 426.73       | 417.20       | 1.01        | 137.2, 109.1           | [M+H] <sup>+</sup> | Triterpene | 76.1                     | MzCloud         |

18 ※Symbols represent reference standard chemicals. GNPS = Global Natural Products Social Molecular Networking platform; TCM = Traditional Chinese Medicine library;

19

20 **Table S2** Calibration experimental data of 18 dividual compounds.

| NO | Compound                              | Calibration equation     | R <sup>2</sup> | Linear range<br>(µg/ml) | LOD<br>(ng/mL) | LOQ<br>(ng/mL) | Intra-day<br>RSD (%)<br>(n = 6) | Inter-day RSD<br>(%) (n = 6) | Recovery and<br>RSD (%)<br>(mean, n = 6) | Stability<br>(RSD, %, n = 6) | Recovery<br>(%, n = 3) |
|----|---------------------------------------|--------------------------|----------------|-------------------------|----------------|----------------|---------------------------------|------------------------------|------------------------------------------|------------------------------|------------------------|
| 1  | Ascorbic acid                         | $y = 123.76x - 87.63$    | 0.9995         | 0.39-32.50              | 1.8            | 5.8            | 2.57                            | 1.85                         | 3.36                                     | 2.68                         | 101.73                 |
| 2  | Malic acid                            | $y = 1295.80x + 493.91$  | 0.9993         | 0.39-31.25              | 1.5            | 4.9            | 2.37                            | 2.44                         | 2.58                                     | 2.93                         | 104.28                 |
| 3  | Citric acid                           | $y = 377.70x - 1700$     | 0.9997         | 0.39-62.50              | 1.6            | 5.2            | 2.06                            | 1.57                         | 1.78                                     | 2.48                         | 100.34                 |
| 4  | Succinic acid                         | $y = 55.48x + 55.96$     | 0.9990         | 0.39-31.25              | 1.1            | 3.6            | 1.67                            | 1.73                         | 4.02                                     | 3.28                         | 99.29                  |
| 5  | Quinic acid                           | $y = 3255.00x - 292.29$  | 0.9993         | 0.39-31.25              | 0.7            | 2.4            | 1.27                            | 2.16                         | 2.54                                     | 2.64                         | 103.85                 |
| 6  | Cyanidin-3- <i>O</i> -<br>glucoside   | $y = 21741x + 2670.70$   | 0.9996         | 0.078-12.5              | 0.7            | 2.2            | 1.36                            | 1.26                         | 1.23                                     | 2.23                         | 100.29                 |
| 7  | Cyanidin-3- <i>O</i> -<br>galactoside | $y = 28901x + 1701$      | 0.9988         | 0.39-62.5               | 2.2            | 4.0            | 2.34                            | 3.54                         | 2.13                                     | 3.54                         | 99.85                  |
| 8  | Arbutin                               | $y = 15.31x + 1152.90$   | 0.9989         | 0.39-31.25              | 1.6            | 5.0            | 3.37                            | 1.92                         | 4.04                                     | 1.46                         | 99.98                  |
| 9  | Cyanidin-3- <i>O</i> -<br>arabinoside | $y = 74.63x + 152.01$    | 0.9995         | 0.39-12.5               | 0.5            | 1.7            | 0.95                            | 2.65                         | 3.25                                     | 3.56                         | 101.42                 |
| 10 | Chlorogenic acid                      | $y = 2262.20x + 371.15$  | 0.9986         | 0.78-12.5               | 0.6            | 2.0            | 1.89                            | 1.58                         | 1.26                                     | 1.38                         | 103.39                 |
| 11 | (+)-Catechin                          | $y = 22948.30x + 131.16$ | 0.9989         | 1.56-62.5               | 1.2            | 4.5            | 2.56                            | 3.25                         | 3.54                                     | 2.78                         | 103.21                 |
| 12 | (-)-Epicatechin                       | $y = 9058.9x + 1844.50$  | 0.9994         | 0.31-15.63              | 1.3            | 4.2            | 1.23                            | 1.25                         | 2.45                                     | 1.25                         | 102.38                 |
| 13 | Quercetin                             | $y = 1825.10x + 30.56$   | 0.9987         | 0.39-31.25              | 0.9            | 4.9            | 3.64                            | 1.23                         | 1.23                                     | 1.35                         | 101.86                 |
| 14 | <i>P</i> -coumaric acid               | $y = 2985.60x + 960.51$  | 0.9980         | 0.78-15.63              | 0.3            | 1.1            | 2.65                            | 1.82                         | 1.29                                     | 2.85                         | 99.28                  |
| 15 | Astragalin                            | $y = 4003.20x + 890.29$  | 0.9985         | 0.78-32.5               | 0.8            | 3.0            | 1.76                            | 1.59                         | 1.73                                     | 0.85                         | 100.23                 |
| 16 | Benzoic acid                          | $y = 19.15x - 29.08$     | 0.9986         | 1.56-31.25              | 0.6            | 2.2            | 0.99                            | 0.99                         | 1.96                                     | 0.65                         | 103.27                 |
| 17 | Oleanolic acid                        | $y = 110.71x - 6.04$     | 0.9982         | 0.78-15.63              | 1.4            | 5.1            | 2.54                            | 3.04                         | 4.03                                     | 2.64                         | 99.55                  |
| 18 | Ursolic acid                          | $y = 85.626x + 51.25$    | 0.9989         | 0.78-62.5               | 1.7            | 5.4            | 0.86                            | 1.89                         | 3.26                                     | 1.95                         | 101.85                 |

21 1 F. Feng, X. Jiang, J. Qiu, H. Wu, X. Cai and Z. Xiang, *Acta Chromatographica*, 2020, **32**, 215-218.  
22 2 Z. Z. Bai, J. M. Tang, J. Ni, T. T. Zheng, Y. Zhou, D. Y. Sun, G. N. Li, P. Liu, L. X. Niu and Y. L. Zhang, *Food Res Int*, 2021, **148**, 110609.  
23 3 T. Hu, Z. An, C. Shi, P. Li and L. Liu, *J Pharm Biomed Anal*, 2020, **178**, 112815.  
24 4 G. Man, L. Xu, Y. Wang, X. Liao and Z. Xu, *Front Nutr*, 2021, **8**, 807447.  
25 5 I. Lukic, S. Radeka, I. Budic-Leto, M. Bubola and U. Vrhovsek, *Food Chem*, 2019, **300**, 125251.  
26 6 W. M. Zhang, R. F. Li, M. Sun, D. M. Hu, J. F. Qiu and Y. H. Yan, *J Chromatogr B Analyt Technol Biomed Life Sci*, 2014, **965**, 107-111.  
27 7 P. Becker Pertuzatti, M. Teixeira Barcia, S. Gomez-Alonso, H. Teixeira Godoy and I. Hermosin-Gutierrez, *Food Chem*, 2021, **340**, 127958.  
28 8 Y. Zhang, X. Bian, G. Yan, B. Sun, W. Miao, M. Huang, N. Li and J. L. Wu, *Food Chem*, 2023, **405**, 134807.  
29 9 Y. Wang, J. Cheng, W. Jiang and S. Chen, *PeerJ*, 2022, **10**, e14580.  
30 10 A. Girme, P. Bhoj, G. Saste, S. Pawar, A. Mirgal, D. Raut, M. Chavan and L. Hingorani, *J AOAC Int*, 2021, **104**, 1634-1651.  
31 11 M. Kawana, M. Miyamoto, Y. Ohno and A. Kihara, *J Lipid Res*, 2020, **61**, 884-895.  
32 12 N. Peersman, J. V. Elslande, Y. Lepage, S. De Amicis, K. Desmet and P. Vermeersch, *Clin Chem Lab Med*, 2020, **58**, 769-779.  
33 13 W. Gul, S. Gul, S. Chandra, H. Lata, E. Ibrahim and M. ElSohly, *Planta Med*, 2018, **84**, 267-271.  
34 14 P. K. Nguyen, J. E. Owens, L. E. Lowe and E. H. Mooney, *MethodsX*, 2020, **7**, 101050.
